# Supplementary material
Source: publisher figshare collection journal article supplement (https://springernature.figshare.com/ndownloader/files/24505414)
Supplement: Supplementary file 1 [file 24505414]

[Pekka J. Vuorinen, Mervi Rokka, Tiina Ritvanen, Reijo Käkelä, Soili Nikonen, Tapani Pakarinen, and Marja Keinänen: Changes in thiamine concentrations, fatty acid composition, and some other lipid-related biochemical indices in Baltic Sea Atlantic salmon (*Salmo salar*) during the spawning run and pre-spawning fasting. *Helgoland Marine Research 2020*]

a)


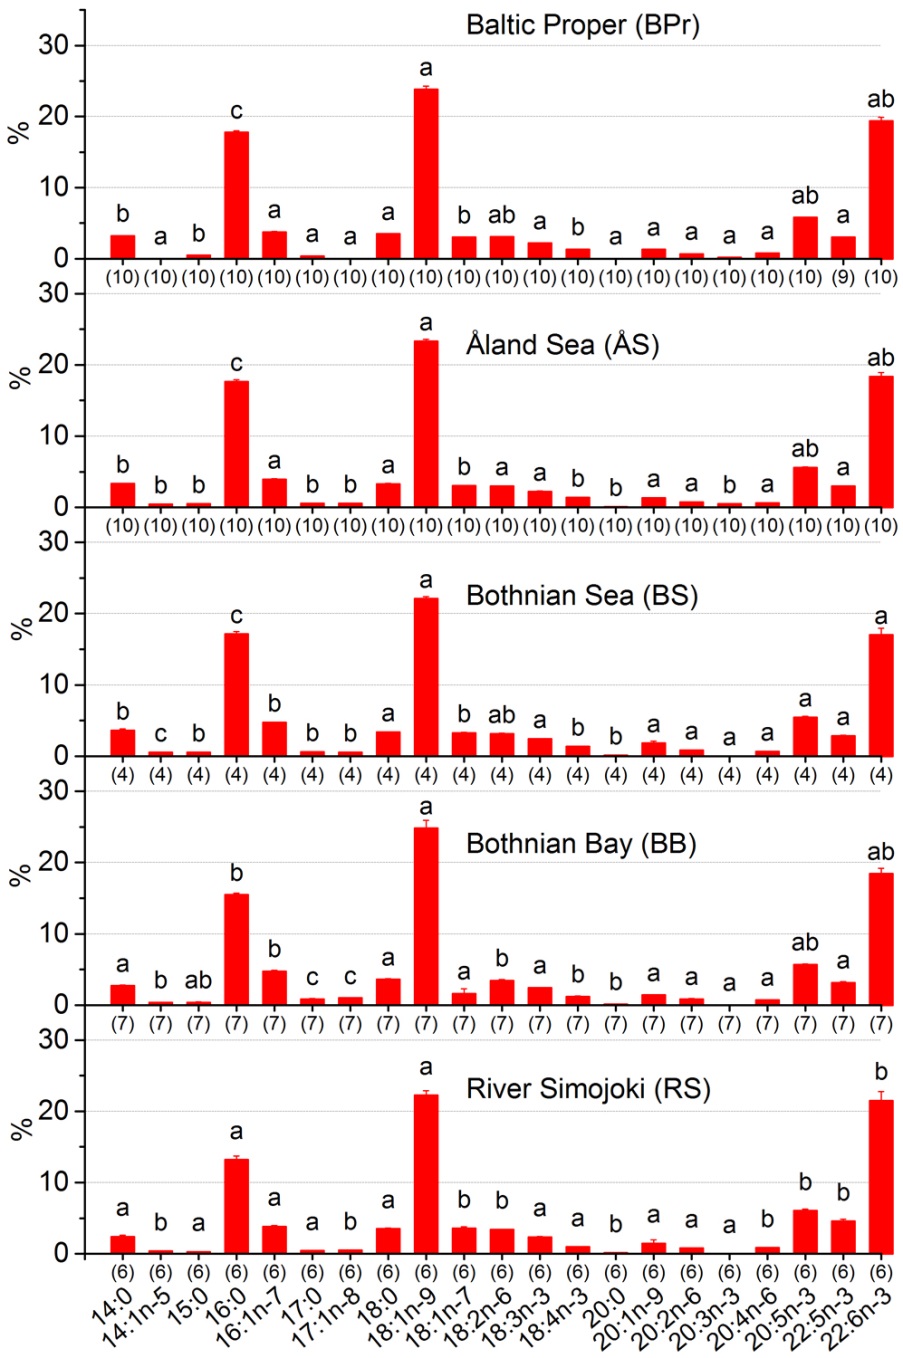


b)


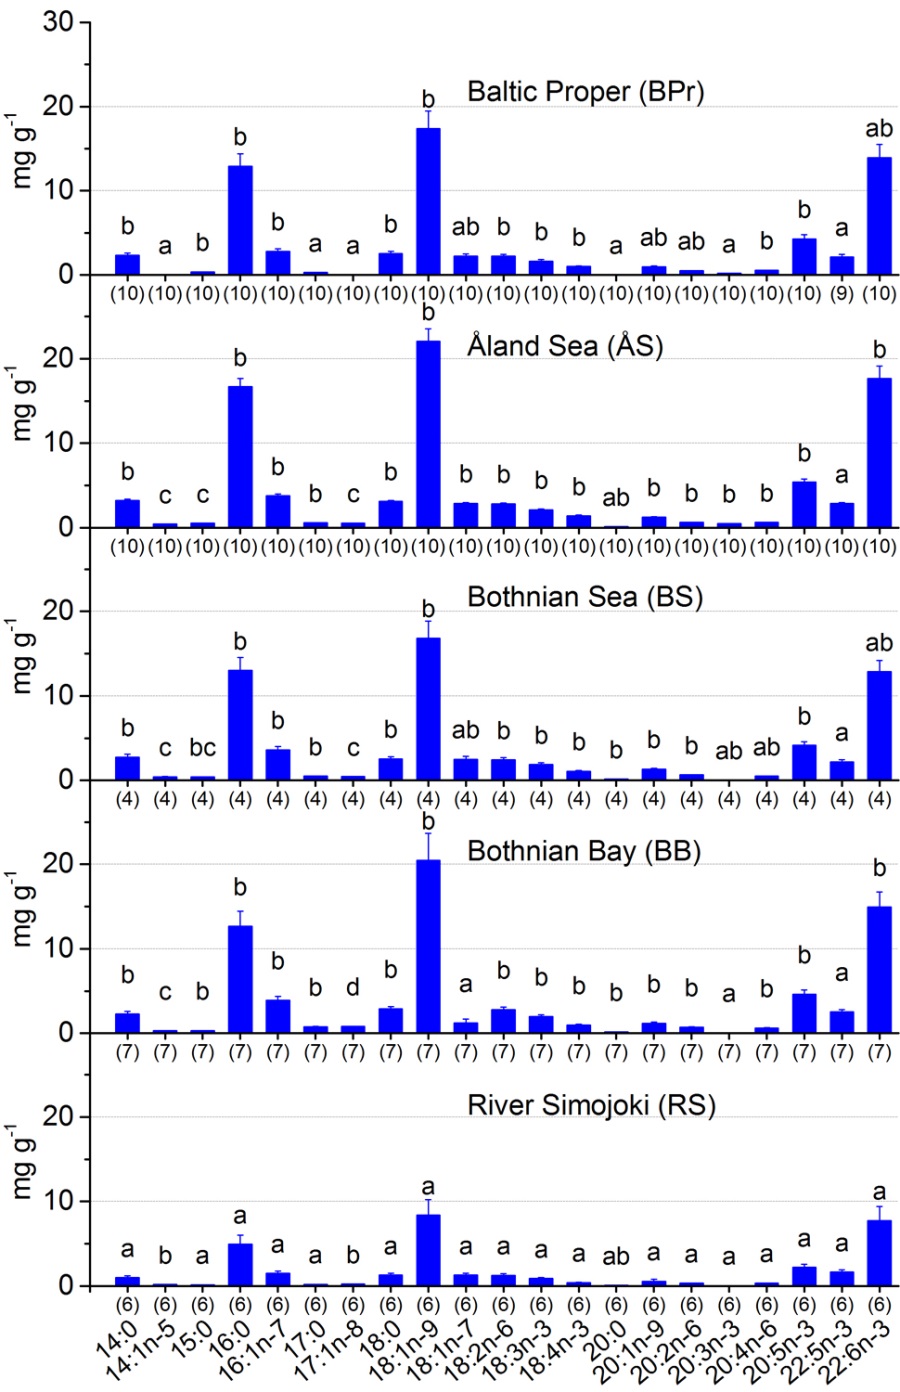


**Additional file 2.** Proportions (a) and concentrations (b) of fatty acids in the muscle of 2-sea-year-old salmon during the 1 400 km spawning run from the Baltic Proper through the Gulf of Bothnia to the north-eastern Bothnian Bay at four locations and at spawning time in the River Simojoki. Significant differences (*p* < 0.05, *post hoc* SNK in one-way ANOVA) in the means between the sampling locations are indicated with no common letter. The number of specimens is given in parentheses.
